# Supplementary material for: Surveillance for Western Equine Encephalitis, St. Louis Encephalitis, and West Nile Viruses Using Reverse Transcription Loop-Mediated Isothermal Amplification
Source: PubMed Central journal article supplement (PMC4726549; doi:10.1371/journal.pone.0147962), 2016-01-25
Supplement: pone.0147962.s004.pdf [file pone.0147962.s004.pdf]

**S2 Table:** Additional RT-LAMP primer sets for SLEV and WEEV

| <b>Primer Name</b>                    | <b>Genome position<sup>1</sup></b> | <b>Sequence<sup>2</sup></b>                          | <b>Source</b> |
|---------------------------------------|------------------------------------|------------------------------------------------------|---------------|
| SLEV-C F3                             | 176-193                            | GTAGAAACCGGGTTGTCAATA                                | New           |
| SLEV-C B3                             | 383-364                            | GATGGTGTCTAGCATRGATC                                 |               |
| SLEV-C FIP<br>(F1c + F2)              | 247-227;<br>176-193                | <u>ATGGCTAGTATGAACCGCACG</u> +<br>CTTGACGGGGTTGAAGAG |               |
| SLEV-C BIP <sup>3</sup><br>(B1c + B2) | 268-288;<br>340-323                | <u>CAGCTCTACAGCCAACTGAGG</u> +<br>AGGTGTTTCAATGCCGTT |               |
| SLEV-C LF                             | 215-194                            | ATCCAGCAGACTTCCAAGTATC                               |               |
| SLEV-C LB                             | 290-307                            | GCTGAAGCGCAGATGGAG                                   |               |
| WEEV nsP1 F3                          | 1376-1394                          | CCGTCTTTGACTCATTGT                                   | New           |
| WEEV nsP1 B3                          | 1643-1626                          | CCTGCCTCTTGATAATG                                    |               |
| WEEV nsP1 FIP<br>(F1c + F2)           | 1529-1512;<br>1455-1472;           | <u>TCTTGCTGTAAGCCACGC</u> +<br>GCTTGAACCAACTGTCAA    |               |
| WEEV nsP1 BIP<br>(B1c + B2)           | 1549-1568<br>1621-1604             | <u>GCGGAAGAGATCAGAGAAGC</u> +<br>CTACTTCTGCCTCTACGG  |               |
| WEEV nsP1 LF                          | 1493-1476                          | ATTGTAATAGCCGGTGCG                                   |               |
| WEEV nsP1 LB                          | 1576-1594                          | CCCTTGCTCCCTGAAATAG                                  |               |

<sup>1</sup> Genome positions are based on SLEV strain Kern217 (Genbank DQ525916.1) and WEEV strain Montana-64 (Genbank GQ287643.1).
